# Supplementary material for: Ureaplasma Species Modulate Cytokine and Chemokine Responses in Human Brain Microvascular Endothelial Cells
Source: PubMed Central journal article supplement (PMC6678482; doi:10.3390/ijms20143583), 2019-07-22
Supplement: ijms-20-03583-s001.pdf [file ijms-20-03583-s001.pdf]

**Supplementary file 1.** Readout methods applied to individual mediators.

|                                | <b>qRT-PCR</b> | <b>RNA-sequencing</b> | <b>immunoassay</b> | <b>flow cytometry</b> |
|--------------------------------|----------------|-----------------------|--------------------|-----------------------|
| <b>CXCL5</b>                   | yes            | yes                   | yes                | no                    |
| <b>CXCR4</b>                   | yes            | yes                   | no                 | no                    |
| <b>IL-1<math>\alpha</math></b> | yes            | yes                   | yes                | no                    |
| <b>IL-1<math>\beta</math></b>  | yes            | yes                   | yes                | no                    |
| <b>IL-1RA</b>                  | no             | yes                   | yes                | no                    |
| <b>IL-6</b>                    | no             | yes                   | yes                | no                    |
| <b>IL-8</b>                    | yes            | yes                   | yes                | yes                   |
| <b>IL-10</b>                   | yes            | yes                   | yes                | yes                   |
| <b>MCP-1</b>                   | yes            | yes                   | yes                | no                    |
| <b>MCP-3</b>                   | yes            | yes                   | yes                | no                    |
| <b>MMP-9</b>                   | yes            | yes                   | yes                | yes                   |
| <b>TNF-<math>\alpha</math></b> | yes            | no                    | yes                | no                    |
